# Supplementary material
Source: ML conference proceedings conference paper supplement (https://proceedings.mlr.press/v37/daniely15.html)
Supplement: Supplementary file 1 [file daniely15-supp.pdf]

---

## Supplement: Strongly Adaptive Online Learning

---

**Amit Daniely**  
**Alon Gonen**  
**Shai Shalev-Shwartz**  
The Hebrew University

AMIT.DANIELY@MAIL.HUJI.AC.IL  
ALONGNN@CS.HUJI.AC.IL  
SHAIS@CS.HUJI.AC.IL

### 1. Proof of Theorem 1

#### 1.1. Proving Theorem 1 to Any Interval in $\mathcal{I}$

**Proof (of Lemma 1)** The proof is by induction on  $t$ . For  $t = 1$ , we have

$$\tilde{W}_1 = \tilde{w}_1([1, 1]) = 1.$$

Next, we assume that the claim holds for any  $t' \leq t$  and prove it for  $t + 1$ . Since  $|\{[q, s] \in \mathcal{I} : q = t\}| \leq \lfloor \log(t) \rfloor + 1$  for all  $t \geq 1$ , we have

$$\begin{aligned} \tilde{W}_{t+1} &= \sum_{I=[q,s] \in \mathcal{I}} \tilde{w}_{t+1}(I) \\ &= \sum_{I=[t+1,s] \in \mathcal{I}} \tilde{w}_{t+1}(I) + \sum_{\substack{I=[q,s] \in \mathcal{I}: \\ q \leq t}} \tilde{w}_{t+1}(I) \\ &\leq \log(t+1) + 1 + \sum_{\substack{I=[q,s] \in \mathcal{I}: \\ q \leq t}} \tilde{w}_{t+1}(I). \end{aligned}$$

Next, according to the induction hypothesis, we have

$$\begin{aligned} \sum_{\substack{I=[q,s] \in \mathcal{I}: \\ q \leq t}} \tilde{w}_{t+1}(I) &= \sum_{\substack{I=[q,s] \in \mathcal{I}: \\ q \leq t}} \tilde{w}_t(I)(1 + \eta_I \cdot I(t) \cdot r_t(I)) \\ &= \tilde{W}_t + \sum_{I \in \mathcal{I}} \eta_I \cdot I(t) \cdot r_t(I) \cdot \tilde{w}_t(I) \\ &\leq t(\log(t) + 1) + \sum_{I \in \mathcal{I}} w_t(I) \cdot r_t(I). \end{aligned}$$

Hence,

$$\begin{aligned} \tilde{W}_{t+1} &\leq t(\log(t) + 1) + \log(t+1) + 1 + \sum_{I \in \mathcal{I}} w_t(I) \cdot r_t(I) \\ &\leq (t+1)(\log(t+1) + 1) + \sum_{I \in \mathcal{I}} w_t(I) \cdot r_t(I). \end{aligned}$$

We complete the proof by showing that  $\sum_{I \in \mathcal{I}} w_t(I) \cdot r_t(I) = 0$ . Since  $x_t = x_{I,t}$  with probability  $p_t(I)$  for

every  $I \in \mathcal{I}$ , we obtain

$$\begin{aligned} \sum_{I \in \mathcal{I}} w_t(I) \cdot r_t(I) &= W_t \sum_{I \in \mathcal{I}} p_t(I) (\ell_t(x_t) - \ell_t(x_t(I))) \\ &= W_t (\ell_t(x_t) - \ell_t(x_t)) \\ &= 0. \end{aligned}$$

Combining the above inequalities, we conclude the lemma.

**Proof (of Lemma 2)** Fix some  $I = [q, s] \in \mathcal{I}$ . We need to show that

$$\sum_{t=q}^s r_t(I) \leq 5 \log(s+1) \sqrt{|I|}.$$

Since weights are non-negative, using Lemma 1, we obtain

$$\tilde{w}_{s+1}(I) \leq \tilde{W}_{s+1} \leq (s+1)(\log(s+1) + 1),$$

Hence,

$$\ln(\tilde{w}_{s+1}(I)) \leq \ln(s+1) + \ln(\log(s+1) + 1). \quad (1)$$

Next, we note that

$$\tilde{w}_{s+1}(I) = \prod_{t=q}^s (1 + \eta_I \cdot I(t) \cdot r_t(I)) = \prod_{t=q}^s (1 + \eta_I \cdot r_t(I)).$$

Noting that  $\eta_I \in (0, 1/2)$  and using the inequality  $\ln(1+x) \geq x - x^2$  which holds for every  $x \geq -1/2$ , we obtain

$$\begin{aligned} \ln(\tilde{w}_{s+1}(I)) &= \sum_{t=q}^s \ln(1 + \eta_I \cdot r_t(I)) \\ &\geq \sum_{t=q}^s \eta_I \cdot r_t(I) - \sum_{t=q}^s (\eta_I \cdot r_t(I))^2 \\ &\geq \eta_I \left( \sum_{t=q}^s r_t(I) - \eta_I |I| \right). \end{aligned} \quad (2)$$

Combining Equation (2) and Equation (1) and dividing by

$\eta_I$ , we obtain

$$\begin{aligned} \sum_{t=q}^s r_t(I) &\leq \eta_I |I| + \eta_I^{-1} (\ln(s+1) + \ln(\log(s+1) + 1)) \\ &\leq \eta_I |I| + \eta_I^{-1} (\log(s+1) + \log(s+1)) \\ &\leq \eta_I |I| + 2\eta_I^{-1} \log(s+1), \end{aligned}$$

where the second inequality follows from the inequality  $x \geq \ln(1+x)$ . Substituting  $\eta_I := \min\left\{1/2, \frac{1}{\sqrt{|I|}}\right\}$ , we conclude the lemma.

## 1.2. Extending The Theorem to Any Interval

In the next part we complete the proof of Theorem 1 by extending Lemma 2 to every interval.

Before proceeding, we set up an additional notation and also make some simple but useful observations regarding the properties of the set  $\mathcal{I}$  (defined in Section 2).

For an interval  $J \subseteq \mathbb{N}$ , we define the restriction of  $\mathcal{I}$  to  $J$  by  $\mathcal{I}|_J$ . That is,  $\mathcal{I}|_J = \{I \in \mathcal{I} : I \subseteq J\}$ . We next list some useful properties of the set  $\mathcal{I}$  that follow immediately from its definition (thus, we do not prove these claims).

### Lemma 1.1

1. The size of every interval  $I \in \mathcal{I}$  is  $2^j$  for some  $j \in \mathbb{N} \cup \{0\}$ .
2. For every  $j \in \mathbb{N} \cup \{0\}$ , the left endpoint of the leftmost interval  $I$  whose size is  $2^j$  is  $2^j$ . Thus, the size of every interval which is located to the left of  $I$  is smaller than  $|I| = 2^j$ .
3. Let  $I = [q, s] \in \mathcal{I}$  be an interval and let  $I' = [q', q-1]$  be another interval of size  $2^j |I|$  for some  $j \leq 0$ . Then,  $I' \in \mathcal{I}$ .
4. Let  $I = [q, s] \in \mathcal{I}$  be an interval and let  $I' = [s+1, s']$  be a consecutive interval of size  $2^j |I|$  for some  $j \leq 0$ . Then,  $I' \in \mathcal{I}$ .
5. Let  $I = [q, s] \in \mathcal{I}$  be an interval of size  $2^j$  for some  $j \in \mathbb{N} \cup \{0\}$ . Then, (exactly) one of the intervals  $[q, q+2^{j+1}-1]$ ,  $[s+1, s+2^{j+1}]$  (whose size is  $2^{j+1}$ ) belongs to  $\mathcal{I}$ .

The following lemma is a key tool for extending Lemma 2 to any interval.

**Lemma 1.2** *Let  $I = [q, s] \subseteq \mathbb{N}$  be an arbitrary interval. Then, the interval  $I$  can be partitioned into two finite sequences of disjoint and consecutive intervals, denoted  $(I_{-k}, \dots, I_0) \subseteq \mathcal{I}|_I$  and  $(I_1, I_2, \dots, I_p) \subseteq \mathcal{I}|_I$ , such that*

$$(\forall i \geq 1) \quad |I_{-i}|/|I_{-i+1}| \leq 1/2.$$

$$(\forall i \geq 2) \quad |I_i|/|I_{i-1}| \leq 1/2.$$

The lemma is illustrated in Figure 1.2. We next prove the lemma. Whenever we mention Property 1, ..., 5, we refer to Property 1, ..., 5 of Lemma 1.1.

**Proof** Let  $b_0 = \max\{|I'| : I' \in \mathcal{I}|_I\}$  be the maximal size of any interval  $I' \in \mathcal{I}$  that is contained in  $I$ . Among all of these intervals, let  $I_0$  be the leftmost interval, i.e., we define

$$\begin{aligned} q_0 &:= \arg \min\{q' : [q', q' + b_0 - 1] \in \mathcal{I}|_I\} \\ s_0 &= q_0 + b_0 - 1 \\ I_0 &= [q_0, s_0]. \end{aligned}$$

Starting from  $q_0 - 1$ , we define a sequence of disjoint and consecutive intervals (in a reversed order), denoted  $(I_{-1}, \dots, I_{-k})$ , as follows:

$$\begin{aligned} [q_{-1}, s_{-1}] &:= I_{-1} \\ &:= \arg \max_{\substack{I'=[q', s'] \in \mathcal{I}|_{[q, q_0-1]} \\ s'=q_0-1}} |I'| \\ &\vdots \\ [q_{-i}, s_{-i}] &:= I_{-i} \\ &:= \arg \max_{\substack{I'=[q', s'] \in \mathcal{I}|_{[q, q_{-i+1}-1]} \\ s'=q_{-i+1}-1}} |I'| \\ &\vdots \end{aligned}$$

Clearly, this sequence is finite and the left endpoint of the leftmost interval,  $I_{-k}$ , is  $q$ . Denote the size of  $I_{-i}$  by  $b_{-i}$ . We next prove that for every  $i \geq 1$ ,  $b_{-i}/b_{-i+1} = 2^j$  for some  $j \leq -1$ . We note that according to Property 1, it suffices to show that  $b_{-i} < b_{-i+1}$  for every  $i \geq 1$ . We use induction. The base case follows from the minimality of  $I_0$ . We next assume that the claim holds for every  $i \in \{1, \dots, k-1\}$  and prove for  $k$ . Assume by contradiction that  $b_{-k} \geq b_{-k+1}$ . Consider the interval  $\hat{I}_{-k+1}$  which is obtained by concatenating a copy of  $I_{-k+1}$  to its left<sup>1</sup>. It follows that  $\hat{I}_{-k+1}$  is an interval of size  $2b_{-k+1}$  which is contained in  $[q, q_{-k+2} - 1]$  and its right endpoint is  $q_{-k+2} - 1$ . According to the induction hypothesis,  $|\hat{I}_{-k+1}| = 2b_{-k+1} = 2^j \cdot b_{-k+2}$  for some  $j \leq 0$ . It follows from Property 3 that  $\hat{I}_{-k+1} \in \mathcal{I}|_I$ , contradicting the maximality of  $I_{-k+1}$ .

Similarly, starting from  $s_0 + 1$ , we define a sequence of

<sup>1</sup>Formally,  $\hat{I}_{-k+1} := [q_{-k+1} - b_{-k+1}, q_{-k+1} - 1] \cup I_{-k+1}$ .

disjoint and consecutive intervals, denoted  $(I_1, \dots, I_p)$ :

$$\begin{aligned} [q_1, s_1] &:= I_1 \\ &:= \arg \max_{\substack{I'=[q', s'] \in \mathcal{I}_{[s_0+1, s]} \\ q'=s_0+1}} |I'| \\ &\vdots \\ [q_i, s_i] &:= I_i \\ &:= \arg \max_{\substack{I'=[q', s'] \in \mathcal{I}_{[s_{i-1}+1, s]} \\ q'=s_{i-1}+1}} |I'| \\ &\vdots \end{aligned}$$

Clearly, this sequence is finite and the right endpoint of the rightmost interval,  $I_p$ , is  $s$ . Denote the size of  $I_i$  by  $b_i$ . We next prove that for every  $i \geq 2$ ,  $b_i/b_{i-1} = 2^j$  for some  $j \leq -1$ . According to Property 1, it suffices to prove that  $b_i < b_{i-1}$  for every  $i \geq 2$ . For this purpose, we first note that  $b_1 \leq b_0$ ; this follows immediately from the definition of  $b_0$ . Hence, we may assume that  $b_i/b_{i-1} \in \{2^j : j \leq 0\}$  for every  $i \in \{1, \dots, p-1\}$  and prove that  $b_p < b_{p-1}$ . Assume by contradiction that  $b_p \geq b_{p-1}$ . Consider the interval  $\hat{I}_{p-1}$  which is obtained by concatenating a copy of  $I_{p-1}$  to its right. It follows that  $\hat{I}_{p-1}$  is an interval of size  $2b_{p-1}$  which is contained in  $[s_{p-2}+1, s]$  and its left endpoint is  $s_{p-2}+1$ . According to the induction hypothesis,  $|\hat{I}_{p-1}| = 2b_{p-1} = 2^j \cdot b_{p-2}$  for some  $j \leq 1$ . We need to consider the following two cases:

- Assume first that  $j \leq 0$  (thus,  $b_{p-1}/b_{p-2} \leq 1/2$ ). Then, it follows from Property 4 that  $\hat{I}_{p-1} \in \mathcal{I}_I$ , contradicting the maximality of  $I_{p-1}$ .
- Assume that  $j = 1$  (i.e.,  $b_{p-1} = b_{p-2}$ ). Then, using Property 5, we obtain a contradiction to the maximality of  $I_{k-2}$ .

We are now ready to complete the proof of Theorem 1.

**Proof (of Theorem 1)** Consider an arbitrary interval  $I = [q, s] \subseteq [T]$ , and let  $I = \bigcup_{i=-k}^p I_i$  be the partition described in Lemma 1.2. Then,

$$\begin{aligned} R_{\text{SAOL}^\mathcal{B}}(I) &\leq \sum_{i \leq 0} R_{\text{SAOL}^\mathcal{B}}(I_i) \\ &\quad + \sum_{i \geq 1} R_{\text{SAOL}^\mathcal{B}}(I_i). \end{aligned} \quad (3)$$

We next bound the first term in the the right-hand side of

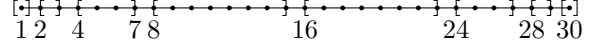

Figure 1. Geometric Covering of Interval: The interval  $I = [1, 30]$  is partitioned into the sequences  $(I_{-1} = [1], I_{-2} = [2, 3], I_{-1} = [4, 7], I_0 = [8, 15])$  and  $(I_1 = [16, 23], I_2 = [24, 27], I_3 = [28, 29], I_4 = [30])$

Equation (3). According to Lemma 2, we obtain that

$$\begin{aligned} \sum_{i \leq 0} R_{\text{SAOL}^\mathcal{B}}(I_i) &\leq C \sum_{i \leq 0} |I_i|^\alpha \\ &\quad + 5 \sum_{i \leq 0} \log(s+1) |I_i|^{1/2} \\ &\leq C \sum_{i \leq 0} |I_i|^\alpha \\ &\quad + 5 \log(s+1) \sum_{i \leq 0} |I_i|^{1/2}. \end{aligned}$$

According to Lemma 1.2,

$$\begin{aligned} \sum_{i \leq 0} |I_i|^\alpha &\leq \sum_{i=0}^{\infty} (2^{-i} |I|)^\alpha \\ &= \frac{2^\alpha}{2^\alpha - 1} |I|^\alpha \\ &\leq \frac{2}{2^\alpha - 1} |I|^\alpha. \end{aligned}$$

Similarly, we have

$$\sum_{i \leq 0} |I_i|^{1/2} \leq \frac{\sqrt{2}}{\sqrt{2} - 1} |I|^{1/2} \leq 4 |I|^{1/2}.$$

Combining the three last inequalities, we obtain that

$$\sum_{i \leq 0} R_{\text{SAOL}^\mathcal{B}}(I_i) \leq \frac{2}{2^\alpha - 1} C |I|^\alpha + 20 \log(s+1) |I|^{1/2}.$$

The second term of the right-hand side of Equation (3) is bounded identically. Hence,

$$R_{\text{SAOL}^\mathcal{B}}(I) \leq \frac{4}{2^\alpha - 1} C |I|^\alpha + 40 \log(s+1) |I|^{1/2}.$$
